# Supplementary figures and images for: LRT, a tendon-specific leucine-rich repeat protein, promotes muscle-tendon targeting through its interaction with Robo
Source: Oxford University Press journal article supplement (doi:10.1242/dev.040329), 2009-10-01

A

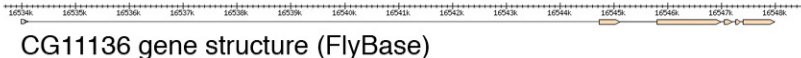

B

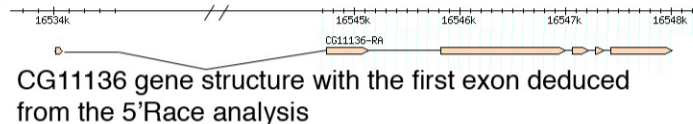

C

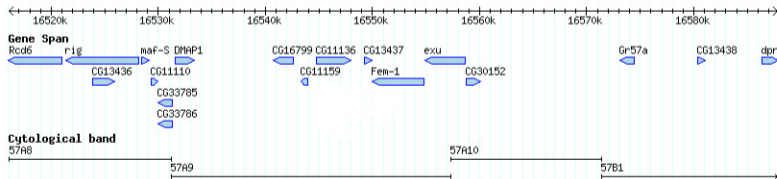

*Df(2R)BSC404*

Supplement: dev040329-sup-040329-figs1.pdf [file dev040329-sup-040329-figs1.pdf]

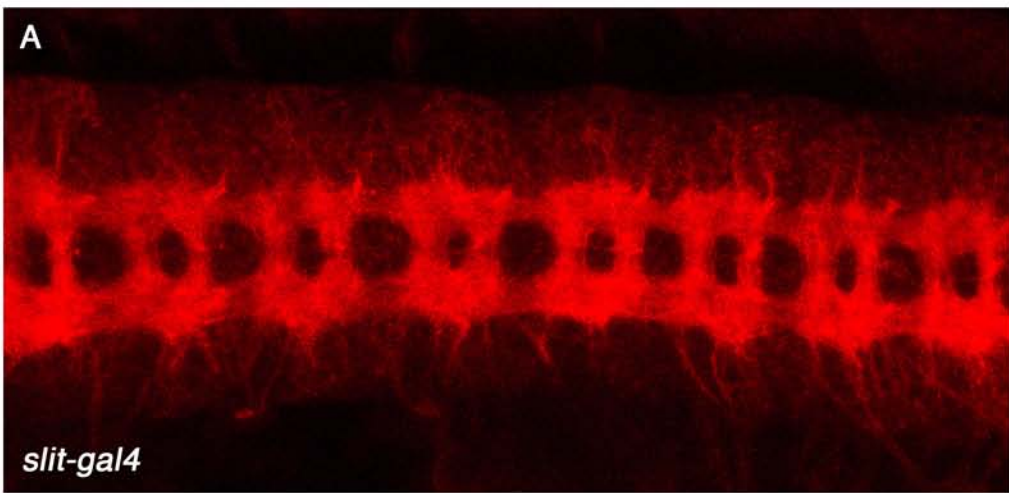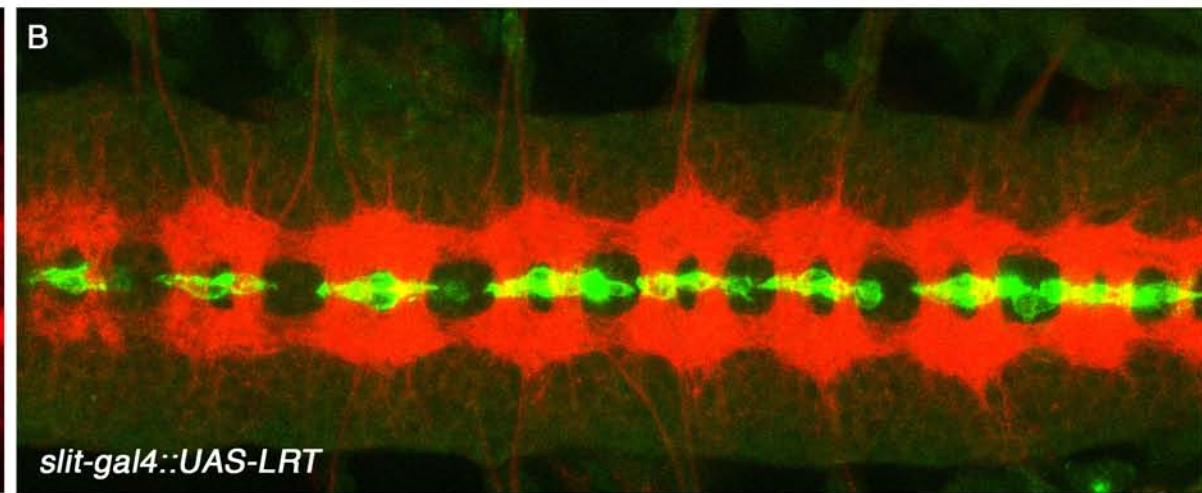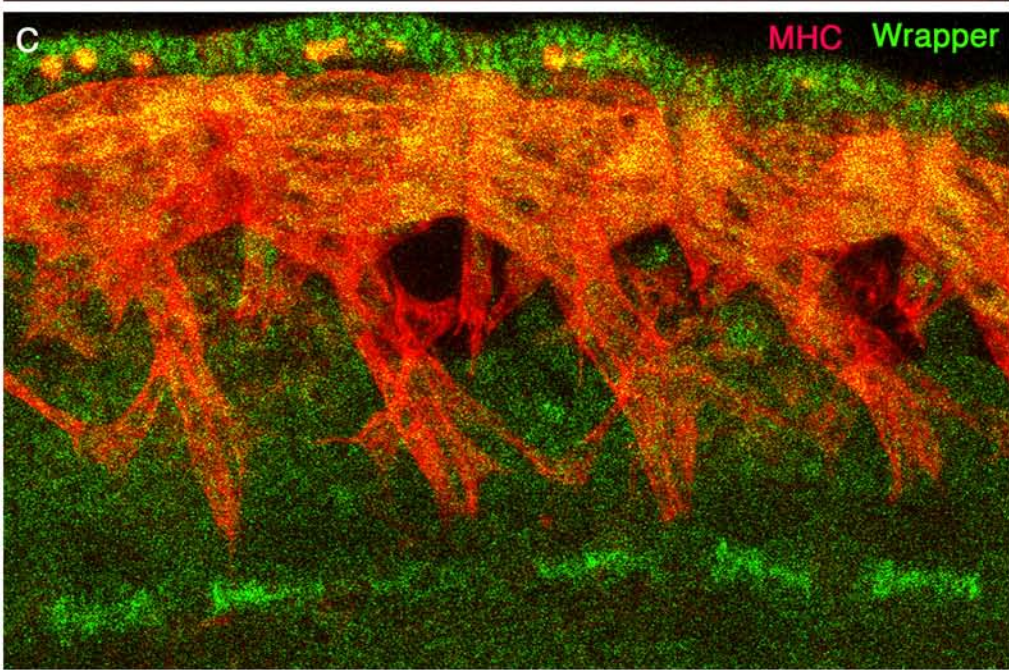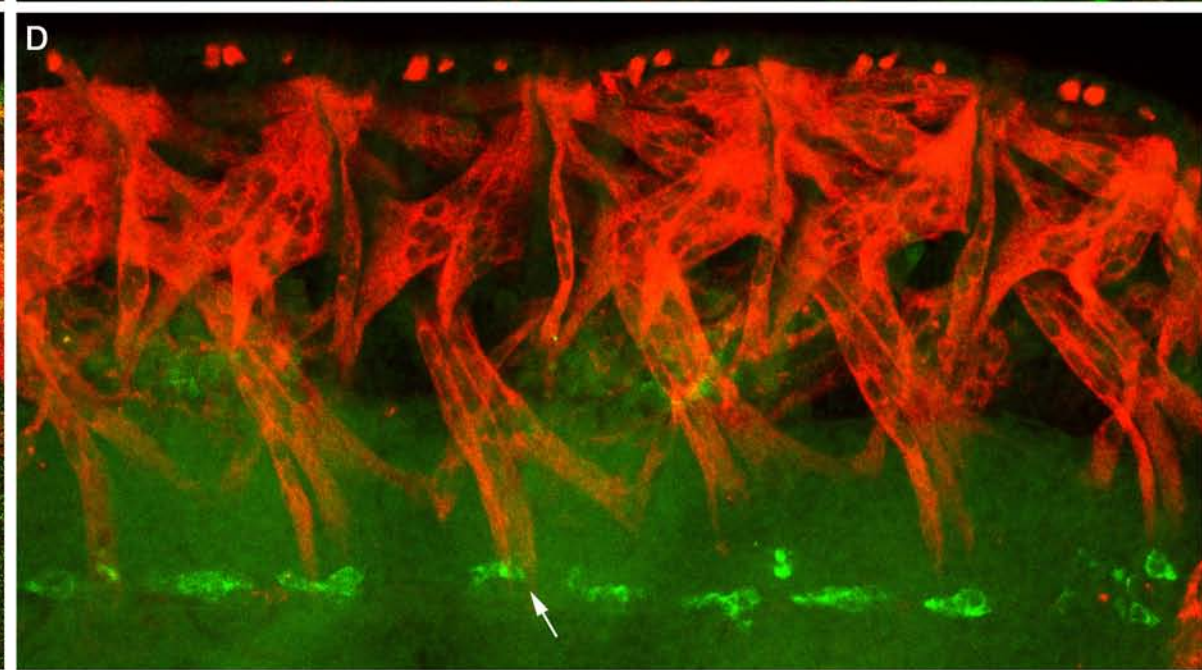

Supplement: dev040329-sup-040329-figs2.pdf [file dev040329-sup-040329-figs2.pdf]
